# Supplementary material for: IL18-containing 5-gene signature distinguishes histologically identical dermatomyositis and lupus erythematosus skin lesions
Source: PubMed Central journal article supplement (PMC7455118; doi:10.1172/jci.insight.139558), 2020-08-20
Supplement: jciinsight-5-139558-s150.pdf [file jciinsight-5-139558-s150.pdf]

**Supplemental Figure 1: xCell analysis of HC vs. DM showing stromal and inflammatory cell populations responsible for gene expression.**

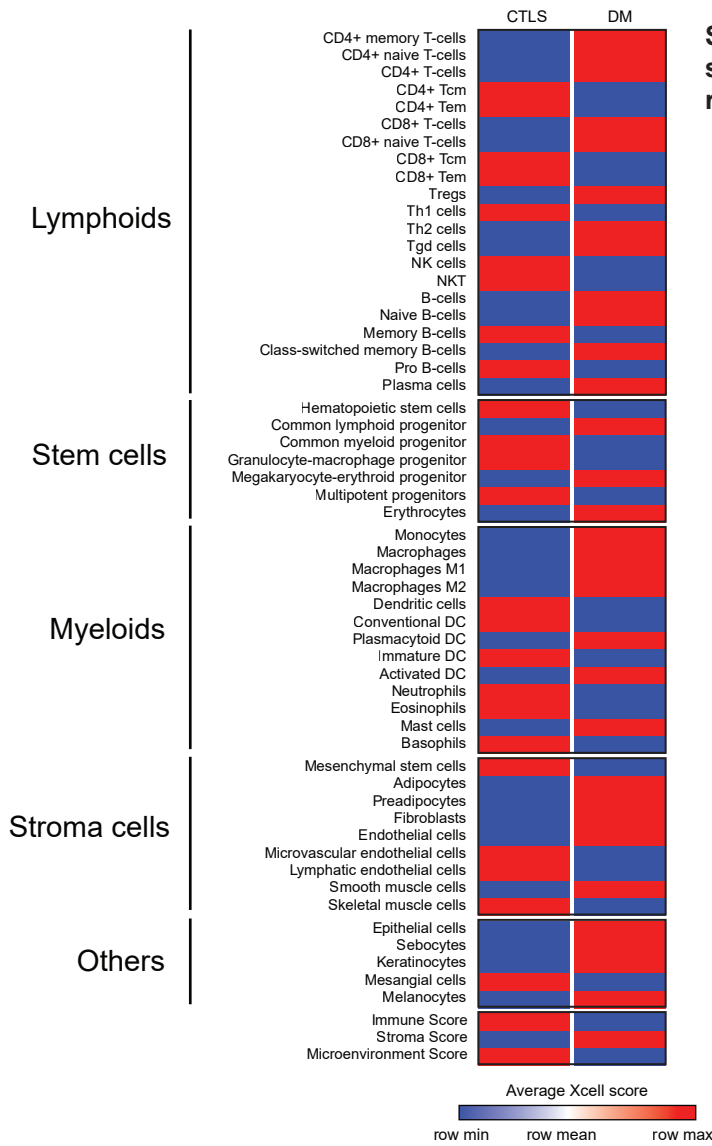

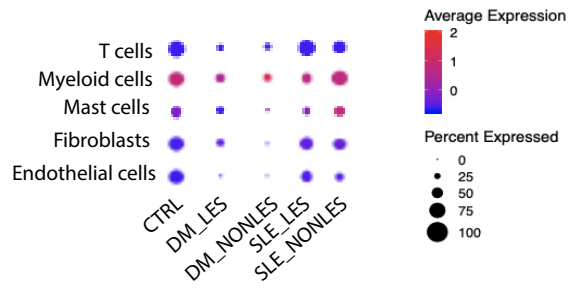

**Supplemental Figure 2.** Single cell RNA-sequencing analysis of IL-18 expression in inflammatory cell populations in control (CTRL), DM (lesional and non-lesional) and SCLE (lesional and non-lesional) skin. Graph represents gene expression in indicated cells for % of cells expressing IL-18 (by size of circle) and degree of expression (by color).
