# Supplementary material for: IL18-containing 5-gene signature distinguishes histologically identical dermatomyositis and lupus erythematosus skin lesions
Source: JCI journal article supplement (doi:10.1172/jci.insight.139558), 2020-07-09
Supplement: sd2 [file 2]

**Supplemental Table 1:** List and regulation of the 251 genes significantly regulated in DM, DLE and SCLE compared to controls (FDR  $\leq$  10% and  $|\log_2$  Fold-Change|  $\geq$  1). Blue/red: down/up-regulation in disease compared to controls.

| Entrez Gene ID                                                       | Gene symbol  | DM      |        | SCLE    |        | DLE     |        |
|----------------------------------------------------------------------|--------------|---------|--------|---------|--------|---------|--------|
|                                                                      |              | Log2 FC | FDR    | Log2 FC | FDR    | Log2 FC | FDR    |
| <b>244 genes regulated in the same direction in DM, DLE and SCLE</b> |              |         |        |         |        |         |        |
| 2210                                                                 | FCGR1B       | -3.49   | 0.0000 | -2.71   | 0.0000 | -3.00   | 0.0000 |
| 574032                                                               | MIR20B       | -2.89   | 0.0000 | -1.90   | 0.0000 | -2.97   | 0.0000 |
| 646243                                                               | CXADRP2      | -2.65   | 0.0000 | -2.70   | 0.0000 | -2.34   | 0.0000 |
| 441728                                                               | LOC441728    | -1.71   | 0.0001 | -2.17   | 0.0000 | -2.32   | 0.0000 |
| 100126303                                                            | MIR890       | -3.58   | 0.0000 | -2.94   | 0.0000 | -2.24   | 0.0000 |
| 100616344                                                            | MIR3689D2    | -4.11   | 0.0000 | -2.72   | 0.0000 | -2.22   | 0.0000 |
| 100313830                                                            | MIR548H1     | -3.19   | 0.0000 | -1.87   | 0.0015 | -2.14   | 0.0007 |
| 100302277                                                            | MIR548I2     | -3.96   | 0.0000 | -2.26   | 0.0000 | -2.12   | 0.0000 |
| 102723340                                                            | LOC102723340 | -1.50   | 0.0000 | -2.26   | 0.0000 | -2.09   | 0.0000 |
| 100616398                                                            | MIR4681      | -3.91   | 0.0000 | -2.03   | 0.0000 | -2.09   | 0.0000 |
| 26952                                                                | SMR3A        | -3.79   | 0.0000 | -1.98   | 0.0000 | -2.07   | 0.0000 |
| 28701                                                                | TRAJ54       | -1.40   | 0.0010 | -1.94   | 0.0000 | -1.98   | 0.0000 |
| 100422823                                                            | MIR4300      | -2.54   | 0.0000 | -1.61   | 0.0000 | -1.97   | 0.0000 |
| 102723639                                                            | LOC102723639 | -1.68   | 0.0000 | -2.02   | 0.0000 | -1.89   | 0.0012 |
| 146861                                                               | SLC35G3      | -2.51   | 0.0000 | -1.85   | 0.0000 | -1.88   | 0.0000 |
| 643719                                                               | SCGB1B2P     | -1.11   | 0.0555 | -1.46   | 0.0009 | -1.88   | 0.0000 |
| 100422883                                                            | MIR4325      | -4.50   | 0.0000 | -2.88   | 0.0000 | -1.87   | 0.0000 |
| 100616212                                                            | MIR3689F     | -3.07   | 0.0000 | -2.23   | 0.0000 | -1.84   | 0.0000 |
| 406960                                                               | MIR184       | -2.24   | 0.0000 | -1.21   | 0.0000 | -1.82   | 0.0000 |
| 388394                                                               | RPRML        | -1.76   | 0.0001 | -1.44   | 0.0000 | -1.80   | 0.0000 |
| 407007                                                               | MIR222       | -1.87   | 0.0000 | -1.37   | 0.0011 | -1.74   | 0.0000 |
| 693172                                                               | MIR587       | -3.38   | 0.0000 | -1.87   | 0.0000 | -1.73   | 0.0000 |
| 26595                                                                | OR8B2        | -3.46   | 0.0000 | -1.81   | 0.0000 | -1.67   | 0.0000 |
| 51054                                                                | PLEKHA8P1    | -2.75   | 0.0000 | -1.61   | 0.0000 | -1.66   | 0.0000 |
| 5196                                                                 | PF4          | -2.74   | 0.0000 | -1.70   | 0.0000 | -1.61   | 0.0000 |
| 28591                                                                | TRBV7-7      | -2.92   | 0.0000 | -1.58   | 0.0000 | -1.59   | 0.0000 |
| 6736                                                                 | SRY          | -1.82   | 0.0029 | -1.69   | 0.0009 | -1.56   | 0.0020 |
| 574464                                                               | MIR520F      | -2.16   | 0.0000 | -1.55   | 0.0000 | -1.55   | 0.0000 |
| 100422964                                                            | MIR3150A     | -2.63   | 0.0000 | -1.58   | 0.0000 | -1.54   | 0.0000 |
| 102467217                                                            | LOC102467217 | -2.24   | 0.0000 | -1.90   | 0.0000 | -1.53   | 0.0007 |
| 100616395                                                            | MIR4789      | -3.37   | 0.0000 | -1.25   | 0.0000 | -1.49   | 0.0000 |
| 100506126                                                            | LINC00867    | -2.14   | 0.0000 | -1.48   | 0.0000 | -1.48   | 0.0000 |
| 4991                                                                 | OR1D2        | -2.49   | 0.0000 | -1.30   | 0.0000 | -1.45   | 0.0000 |
| 81061                                                                | OR11H1       | -3.16   | 0.0000 | -1.16   | 0.0010 | -1.44   | 0.0000 |
| 100302177                                                            | MIR1269A     | -3.42   | 0.0000 | -1.67   | 0.0000 | -1.44   | 0.0013 |
| 642569                                                               | TRIM53AP     | -2.66   | 0.0000 | -1.59   | 0.0000 | -1.43   | 0.0000 |
| 5370                                                                 | PMCHL2       | -1.86   | 0.0000 | -1.18   | 0.0540 | -1.42   | 0.0082 |
| 102723629                                                            | LOC102723629 | -1.44   | 0.0000 | -1.71   | 0.0000 | -1.39   | 0.0008 |
| 100302116                                                            | MIR1265      | -1.58   | 0.0000 | -1.36   | 0.0195 | -1.36   | 0.0145 |
| 94236                                                                | DNAJA1P5     | -2.18   | 0.0000 | -1.34   | 0.0000 | -1.34   | 0.0000 |
| 442906                                                               | MIR338       | -2.65   | 0.0000 | -1.11   | 0.0000 | -1.34   | 0.0000 |
| 767611                                                               | SNORD114-30  | -3.06   | 0.0000 | -1.47   | 0.0000 | -1.33   | 0.0013 |
| 101929497                                                            | LOC101929497 | -1.61   | 0.0000 | -1.46   | 0.0000 | -1.33   | 0.0000 |
| 767563                                                               | SNORD113-3   | -2.03   | 0.0000 | -1.75   | 0.0000 | -1.33   | 0.0014 |
| 102724883                                                            | LOC102724883 | -2.20   | 0.0000 | -1.09   | 0.0000 | -1.31   | 0.0000 |
| 100873782                                                            | RNU6-83P     | -2.75   | 0.0000 | -1.59   | 0.0000 | -1.30   | 0.0014 |
| 693162                                                               | MIR577       | -3.24   | 0.0000 | -2.67   | 0.0000 | -1.29   | 0.0000 |
| 100500896                                                            | MIR3666      | -2.93   | 0.0000 | -1.47   | 0.0000 | -1.29   | 0.0000 |
| 391190                                                               | OR2L8        | -3.00   | 0.0000 | -1.58   | 0.0000 | -1.29   | 0.0037 |
| 25826                                                                | SNORD82      | -3.22   | 0.0000 | -1.18   | 0.0016 | -1.29   | 0.0016 |
| 10891                                                                | PPARGC1A     | -1.08   | 0.0000 | -1.05   | 0.0009 | -1.28   | 0.0000 |

|           |              |       |        |       |        |       |        |
|-----------|--------------|-------|--------|-------|--------|-------|--------|
| 102467074 | LINC01377    | -3.86 | 0.0000 | -1.53 | 0.0000 | -1.25 | 0.0000 |
| 728386    | USP17L5      | -3.75 | 0.0000 | -1.08 | 0.0063 | -1.24 | 0.0012 |
| 28595     | TRBV7-3      | -2.66 | 0.0000 | -1.14 | 0.0022 | -1.20 | 0.0007 |
| 28603     | TRBV6-4      | -1.30 | 0.0007 | -1.05 | 0.0016 | -1.17 | 0.0000 |
| 28503     | IGHD2-15     | -2.38 | 0.0000 | -1.29 | 0.0000 | -1.16 | 0.0007 |
| 100616302 | MIR548X2     | -1.81 | 0.0000 | -1.12 | 0.0011 | -1.16 | 0.0000 |
| 100500801 | MIR3659      | -2.78 | 0.0000 | -1.49 | 0.0000 | -1.16 | 0.0007 |
| 2996      | GYPE         | -1.39 | 0.0000 | -1.42 | 0.0000 | -1.16 | 0.0025 |
| 100500880 | MIR3662      | -1.48 | 0.0004 | -1.25 | 0.0000 | -1.15 | 0.0000 |
| 100302115 | MIR1468      | -1.88 | 0.0000 | -1.32 | 0.0000 | -1.14 | 0.0007 |
| 100616375 | MIR4438      | -2.25 | 0.0000 | -1.05 | 0.0010 | -1.13 | 0.0000 |
| 101928188 | LOC101928188 | -2.80 | 0.0000 | -1.14 | 0.0050 | -1.12 | 0.0033 |
| 693142    | MIR557       | -2.59 | 0.0000 | -1.06 | 0.0029 | -1.12 | 0.0012 |
| 101927944 | FAM53B-AS1   | -2.30 | 0.0000 | -1.10 | 0.0009 | -1.11 | 0.0007 |
| 100462981 | MTRNR2L2     | -2.50 | 0.0000 | -1.78 | 0.0009 | -1.11 | 0.0526 |
| 100302283 | MIR1227      | -2.37 | 0.0000 | -1.05 | 0.0036 | -1.11 | 0.0014 |
| 100422855 | MIR4301      | -3.65 | 0.0000 | -1.25 | 0.0063 | -1.10 | 0.0084 |
| 909       | CD1A         | -1.24 | 0.0000 | -1.31 | 0.0000 | -1.10 | 0.0000 |
| 693211    | MIR626       | -2.25 | 0.0000 | -1.29 | 0.0000 | -1.10 | 0.0020 |
| 128872    | HMGB3P1      | -2.46 | 0.0000 | -1.09 | 0.0056 | -1.09 | 0.0036 |
| 342096    | GOLGA6A      | -1.95 | 0.0000 | -1.28 | 0.0009 | -1.09 | 0.0063 |
| 911       | CD1C         | -1.98 | 0.0000 | -1.15 | 0.0000 | -1.09 | 0.0000 |
| 100873764 | RNU6-56P     | -2.72 | 0.0000 | -1.03 | 0.0037 | -1.08 | 0.0012 |
| 170958    | ZNF525       | -1.89 | 0.0000 | -1.35 | 0.0116 | -1.08 | 0.0392 |
| 94115     | CGB8         | -2.73 | 0.0000 | -1.50 | 0.0062 | -1.08 | 0.0468 |
| 100423015 | MIR4289      | -2.08 | 0.0000 | -1.09 | 0.0070 | -1.08 | 0.0063 |
| 1663      | DDX11        | -1.70 | 0.0000 | -1.25 | 0.0009 | -1.06 | 0.0045 |
| 100616352 | MIR4642      | -2.38 | 0.0000 | -1.05 | 0.0000 | -1.02 | 0.0000 |
| 2532      | ACKR1        | -2.44 | 0.0000 | -1.15 | 0.0000 | -1.02 | 0.0000 |
| 100423000 | MIR3161      | -2.78 | 0.0000 | -1.55 | 0.0000 | -1.00 | 0.0008 |
| 414260    | LINC00619    | -2.99 | 0.0000 | -1.01 | 0.0010 | -1.00 | 0.0007 |
| 26784     | SNORA64      | 1.64  | 0.0000 | 1.18  | 0.0000 | 1.03  | 0.0008 |
| 101929768 | OSMR-AS1     | 1.32  | 0.0000 | 1.01  | 0.0557 | 1.04  | 0.0372 |
| 7903      | ST8SIA4      | 1.11  | 0.0000 | 1.07  | 0.0000 | 1.06  | 0.0000 |
| 692206    | SNORD90      | 1.26  | 0.0003 | 1.39  | 0.0000 | 1.06  | 0.0000 |
| 677814    | SNORA31      | 1.73  | 0.0003 | 1.15  | 0.0000 | 1.06  | 0.0000 |
| 677840    | SNORA71D     | 1.73  | 0.0000 | 1.15  | 0.0143 | 1.08  | 0.0233 |
| 10804     | GJB6         | 1.82  | 0.0012 | 1.12  | 0.0159 | 1.08  | 0.0057 |
| 388962    | BOLA3        | 1.18  | 0.0000 | 1.37  | 0.0070 | 1.08  | 0.0513 |
| 8360      | HIST1H4D     | 1.80  | 0.0006 | 1.11  | 0.0374 | 1.09  | 0.0222 |
| 3713      | IVL          | 3.78  | 0.0000 | 1.01  | 0.0220 | 1.11  | 0.0166 |
| 64231     | MS4A6A       | 1.18  | 0.0013 | 1.12  | 0.0000 | 1.12  | 0.0000 |
| 26776     | SNORA71B     | 1.17  | 0.0018 | 1.28  | 0.0000 | 1.13  | 0.0000 |
| 4907      | NT5E         | 2.42  | 0.0000 | 1.17  | 0.0000 | 1.13  | 0.0000 |
| 719       | C3AR1        | 1.89  | 0.0000 | 1.14  | 0.0017 | 1.13  | 0.0000 |
| 51338     | MS4A4A       | 1.05  | 0.0008 | 1.19  | 0.0010 | 1.14  | 0.0000 |
| 677829    | SNORA49      | 1.99  | 0.0000 | 1.07  | 0.0026 | 1.18  | 0.0000 |
| 677770    | SCARNA22     | 1.81  | 0.0004 | 1.42  | 0.0078 | 1.21  | 0.0258 |
| 387357    | THEMIS       | 1.28  | 0.0000 | 1.21  | 0.0000 | 1.22  | 0.0000 |
| 594839    | SNORA33      | 1.00  | 0.0023 | 1.32  | 0.0000 | 1.24  | 0.0000 |
| 677841    | SNORA74B     | 1.20  | 0.0003 | 1.16  | 0.0000 | 1.25  | 0.0000 |
| 255324    | EPGN         | 1.88  | 0.0004 | 1.29  | 0.0010 | 1.26  | 0.0007 |
| 6698      | SPRR1A       | 3.09  | 0.0000 | 1.05  | 0.0016 | 1.26  | 0.0013 |
| 692212    | SNORD99      | 1.46  | 0.0003 | 1.42  | 0.0000 | 1.28  | 0.0000 |
| 4332      | MNDA         | 2.22  | 0.0000 | 1.17  | 0.0000 | 1.29  | 0.0000 |
| 677811    | SNORA28      | 2.47  | 0.0000 | 1.19  | 0.0000 | 1.31  | 0.0000 |
| 22797     | TFEC         | 1.05  | 0.0008 | 1.04  | 0.0000 | 1.31  | 0.0000 |
| 3034      | HAL          | 2.57  | 0.0000 | 1.22  | 0.0019 | 1.31  | 0.0560 |
| 84636     | GPR174       | 1.67  | 0.0000 | 1.05  | 0.0000 | 1.32  | 0.0000 |

|           |             |      |        |      |        |      |        |
|-----------|-------------|------|--------|------|--------|------|--------|
| 1230      | CCR1        | 1.95 | 0.0000 | 1.22 | 0.0000 | 1.33 | 0.0000 |
| 26828     | RNU5F-1     | 1.42 | 0.0108 | 1.35 | 0.0017 | 1.33 | 0.0171 |
| 7305      | TYROBP      | 1.48 | 0.0000 | 1.26 | 0.0000 | 1.33 | 0.0000 |
| 28725     | TRAJ30      | 1.07 | 0.0038 | 1.08 | 0.0000 | 1.34 | 0.0000 |
| 7805      | LAPTM5      | 2.25 | 0.0000 | 1.19 | 0.0000 | 1.34 | 0.0000 |
| 713       | C1QB        | 1.45 | 0.0000 | 1.23 | 0.0000 | 1.34 | 0.0000 |
| 55601     | DDX60       | 2.00 | 0.0000 | 1.00 | 0.0009 | 1.34 | 0.0000 |
| 64581     | CLEC7A      | 1.41 | 0.0000 | 1.40 | 0.0000 | 1.35 | 0.0000 |
| 80830     | APOL6       | 1.38 | 0.0003 | 1.02 | 0.0000 | 1.38 | 0.0000 |
| 25939     | SAMHD1      | 2.57 | 0.0000 | 1.13 | 0.0000 | 1.38 | 0.0000 |
| 677776    | SCARNA8     | 1.01 | 0.0199 | 1.44 | 0.0000 | 1.41 | 0.0000 |
| 5790      | PTPRCAP     | 1.45 | 0.0000 | 1.07 | 0.0000 | 1.42 | 0.0000 |
| 1890      | TYMP        | 1.64 | 0.0000 | 1.34 | 0.0000 | 1.42 | 0.0000 |
| 58475     | MS4A7       | 1.82 | 0.0000 | 1.60 | 0.0000 | 1.43 | 0.0000 |
| 51177     | PLEKHO1     | 1.28 | 0.0000 | 1.15 | 0.0000 | 1.43 | 0.0000 |
| 9246      | UBE2L6      | 2.00 | 0.0000 | 1.21 | 0.0000 | 1.43 | 0.0000 |
| 3659      | IRF1        | 1.83 | 0.0000 | 1.11 | 0.0000 | 1.44 | 0.0000 |
| 567       | B2M         | 2.69 | 0.0000 | 1.30 | 0.0000 | 1.44 | 0.0000 |
| 57674     | RNF213      | 2.53 | 0.0000 | 1.25 | 0.0000 | 1.44 | 0.0000 |
| 9168      | TMSB10      | 2.96 | 0.0000 | 1.23 | 0.0000 | 1.46 | 0.0000 |
| 963       | CD53        | 1.58 | 0.0000 | 1.00 | 0.0000 | 1.47 | 0.0000 |
| 100033435 | SNORD116-24 | 2.97 | 0.0001 | 1.70 | 0.0017 | 1.47 | 0.0012 |
| 9881      | TRANK1      | 2.28 | 0.0000 | 1.09 | 0.0000 | 1.48 | 0.0000 |
| 26775     | SNORA72     | 1.19 | 0.0333 | 1.53 | 0.0000 | 1.49 | 0.0000 |
| 962       | CD48        | 1.21 | 0.0004 | 1.20 | 0.0000 | 1.49 | 0.0000 |
| 968       | CD68        | 1.21 | 0.0003 | 1.30 | 0.0000 | 1.49 | 0.0000 |
| 6672      | SP100       | 2.52 | 0.0000 | 1.22 | 0.0000 | 1.54 | 0.0000 |
| 55619     | DOCK10      | 1.82 | 0.0000 | 1.06 | 0.0000 | 1.54 | 0.0000 |
| 64761     | PARP12      | 2.86 | 0.0000 | 1.21 | 0.0000 | 1.55 | 0.0000 |
| 692110    | SNORD70     | 1.49 | 0.0007 | 1.36 | 0.0000 | 1.55 | 0.0000 |
| 5275      | SERPINB13   | 2.33 | 0.0000 | 1.26 | 0.0043 | 1.56 | 0.0007 |
| 319139    | SNORD56B    | 2.73 | 0.0000 | 1.31 | 0.0040 | 1.56 | 0.0000 |
| 3937      | LCP2        | 1.73 | 0.0000 | 1.21 | 0.0000 | 1.57 | 0.0000 |
| 692229    | SNORD105    | 1.07 | 0.0157 | 1.41 | 0.0000 | 1.58 | 0.0000 |
| 3428      | IFI16       | 2.32 | 0.0000 | 1.16 | 0.0000 | 1.58 | 0.0000 |
| 7453      | WARS        | 2.12 | 0.0000 | 1.50 | 0.0000 | 1.61 | 0.0000 |
| 1520      | CTSS        | 2.44 | 0.0000 | 1.32 | 0.0000 | 1.61 | 0.0000 |
| 6773      | STAT2       | 2.23 | 0.0000 | 1.27 | 0.0000 | 1.64 | 0.0000 |
| 28749     | TRAJ6       | 1.25 | 0.0129 | 1.37 | 0.0009 | 1.66 | 0.0000 |
| 8743      | TNFSF10     | 2.68 | 0.0000 | 1.21 | 0.0000 | 1.66 | 0.0000 |
| 6706      | SPRR2G      | 4.16 | 0.0000 | 1.72 | 0.0066 | 1.70 | 0.0409 |
| 9111      | NMI         | 3.30 | 0.0000 | 1.36 | 0.0000 | 1.70 | 0.0000 |
| 2207      | FCER1G      | 2.10 | 0.0000 | 1.38 | 0.0011 | 1.71 | 0.0000 |
| 1536      | CYBB        | 2.96 | 0.0000 | 1.24 | 0.0000 | 1.72 | 0.0000 |
| 2706      | GJB2        | 1.68 | 0.0002 | 1.19 | 0.0284 | 1.73 | 0.0000 |
| 677765    | SCARNA18    | 1.99 | 0.0000 | 1.78 | 0.0000 | 1.74 | 0.0000 |
| 3429      | IFI27       | 2.55 | 0.0000 | 1.66 | 0.0000 | 1.74 | 0.0000 |
| 3431      | SP110       | 1.83 | 0.0000 | 1.22 | 0.0000 | 1.74 | 0.0000 |
| 677833    | SNORA54     | 1.15 | 0.0145 | 1.55 | 0.0000 | 1.74 | 0.0000 |
| 969       | CD69        | 1.17 | 0.0002 | 1.05 | 0.0000 | 1.75 | 0.0000 |
| 3854      | KRT6B       | 1.04 | 0.0933 | 1.22 | 0.0021 | 1.75 | 0.0000 |
| 8355      | HIST1H3G    | 1.67 | 0.0017 | 2.60 | 0.0151 | 1.78 | 0.0012 |
| 10346     | TRIM22      | 1.91 | 0.0000 | 1.56 | 0.0000 | 1.79 | 0.0000 |
| 1880      | GPR183      | 1.68 | 0.0000 | 1.31 | 0.0000 | 1.80 | 0.0000 |
| 26157     | GIMAP2      | 1.54 | 0.0000 | 1.39 | 0.0000 | 1.80 | 0.0000 |
| 3001      | GZMA        | 1.33 | 0.0040 | 1.26 | 0.0000 | 1.83 | 0.0000 |
| 100033431 | SNORD116-20 | 1.53 | 0.0001 | 1.32 | 0.0000 | 1.83 | 0.0000 |
| 26780     | SNORA68     | 2.30 | 0.0001 | 1.69 | 0.0000 | 1.85 | 0.0000 |
| 6352      | CCL5        | 1.01 | 0.0164 | 1.42 | 0.0000 | 1.86 | 0.0000 |

|           |             |      |        |      |        |      |        |
|-----------|-------------|------|--------|------|--------|------|--------|
| 767577    | SNORD114-1  | 1.98 | 0.0083 | 2.04 | 0.0000 | 1.87 | 0.0000 |
| 330       | BIRC3       | 1.25 | 0.0000 | 1.36 | 0.0000 | 1.91 | 0.0000 |
| 9447      | AIM2        | 1.11 | 0.0018 | 1.43 | 0.0000 | 1.92 | 0.0000 |
| 83666     | PARP9       | 2.77 | 0.0000 | 1.65 | 0.0000 | 1.93 | 0.0000 |
| 780854    | SNORD3D     | 1.54 | 0.0001 | 2.10 | 0.0000 | 1.93 | 0.0000 |
| 677810    | SNORA26     | 1.58 | 0.0000 | 1.69 | 0.0000 | 1.97 | 0.0000 |
| 712       | C1QA        | 1.94 | 0.0000 | 1.76 | 0.0000 | 1.99 | 0.0000 |
| 54739     | XAF1        | 1.76 | 0.0000 | 1.63 | 0.0000 | 2.03 | 0.0000 |
| 91543     | RSAD2       | 2.74 | 0.0000 | 1.68 | 0.0000 | 2.06 | 0.0000 |
| 55008     | HERC6       | 1.74 | 0.0002 | 1.67 | 0.0000 | 2.07 | 0.0000 |
| 4069      | LYZ         | 2.84 | 0.0000 | 1.89 | 0.0000 | 2.09 | 0.0000 |
| 115361    | GBP4        | 3.54 | 0.0000 | 1.30 | 0.0000 | 2.09 | 0.0000 |
| 677842    | SNORA50C    | 3.16 | 0.0002 | 2.99 | 0.0035 | 2.10 | 0.0199 |
| 5996      | RGS1        | 1.47 | 0.0002 | 1.01 | 0.0000 | 2.11 | 0.0000 |
| 10859     | LILRB1      | 1.36 | 0.0019 | 1.10 | 0.0021 | 2.11 | 0.0000 |
| 11274     | USP18       | 2.74 | 0.0000 | 1.98 | 0.0000 | 2.11 | 0.0000 |
| 8519      | IFITM1      | 2.20 | 0.0000 | 1.82 | 0.0000 | 2.12 | 0.0000 |
| 8542      | APOL1       | 1.51 | 0.0000 | 1.96 | 0.0000 | 2.13 | 0.0000 |
| 6699      | SPRR1B      | 3.77 | 0.0000 | 2.46 | 0.0000 | 2.14 | 0.0000 |
| 2359      | FPR3        | 2.50 | 0.0000 | 1.80 | 0.0000 | 2.16 | 0.0000 |
| 100113392 | SNORD11B    | 1.68 | 0.0028 | 2.15 | 0.0000 | 2.16 | 0.0000 |
| 5610      | EIF2AK2     | 3.47 | 0.0000 | 1.53 | 0.0000 | 2.16 | 0.0000 |
| 594838    | SNORD100    | 1.13 | 0.0196 | 2.17 | 0.0000 | 2.16 | 0.0000 |
| 6279      | S100A8      | 3.55 | 0.0000 | 1.77 | 0.0000 | 2.17 | 0.0000 |
| 780853    | SNORD3C     | 2.42 | 0.0000 | 2.06 | 0.0000 | 2.18 | 0.0000 |
| 26810     | SNORD41     | 2.49 | 0.0000 | 1.92 | 0.0000 | 2.19 | 0.0000 |
| 6317      | SERPINB3    | 4.50 | 0.0000 | 2.11 | 0.0000 | 2.24 | 0.0000 |
| 151636    | DTX3L       | 2.19 | 0.0000 | 1.80 | 0.0000 | 2.25 | 0.0000 |
| 5788      | PTPRC       | 2.64 | 0.0000 | 1.67 | 0.0000 | 2.26 | 0.0000 |
| 692227    | SNORD104    | 3.04 | 0.0000 | 2.11 | 0.0000 | 2.28 | 0.0000 |
| 54809     | SAMD9       | 1.71 | 0.0001 | 1.52 | 0.0000 | 2.29 | 0.0000 |
| 100506736 | SLFN12L     | 1.62 | 0.0001 | 1.14 | 0.0000 | 2.29 | 0.0000 |
| 4600      | MX2         | 1.81 | 0.0005 | 1.72 | 0.0000 | 2.32 | 0.0000 |
| 3433      | IFIT2       | 2.92 | 0.0000 | 1.75 | 0.0000 | 2.32 | 0.0000 |
| 56662     | VTRNA1-3    | 1.50 | 0.0251 | 2.10 | 0.0000 | 2.33 | 0.0000 |
| 129607    | CMPK2       | 2.19 | 0.0000 | 1.87 | 0.0000 | 2.33 | 0.0000 |
| 84648     | LCE3D       | 4.44 | 0.0000 | 2.03 | 0.0000 | 2.35 | 0.0012 |
| 26765     | SNORD12C    | 1.28 | 0.0106 | 2.40 | 0.0000 | 2.37 | 0.0000 |
| 23586     | DDX58       | 3.04 | 0.0000 | 1.88 | 0.0000 | 2.37 | 0.0000 |
| 4939      | OAS2        | 3.20 | 0.0000 | 2.04 | 0.0000 | 2.38 | 0.0000 |
| 100113382 | SNORD105B   | 1.27 | 0.0010 | 2.40 | 0.0000 | 2.42 | 0.0000 |
| 3580      | CXCR2P1     | 2.23 | 0.0000 | 1.76 | 0.0000 | 2.49 | 0.0000 |
| 219285    | SAMD9L      | 2.94 | 0.0000 | 1.89 | 0.0000 | 2.53 | 0.0000 |
| 91351     | DDX60L      | 2.30 | 0.0000 | 1.94 | 0.0000 | 2.53 | 0.0000 |
| 100033427 | SNORD116-15 | 1.98 | 0.0000 | 2.11 | 0.0000 | 2.59 | 0.0000 |
| 5266      | PI3         | 3.38 | 0.0006 | 3.02 | 0.0000 | 2.59 | 0.0000 |
| 2537      | IFI6        | 1.02 | 0.0005 | 2.33 | 0.0000 | 2.64 | 0.0000 |
| 56664     | VTRNA1-1    | 4.27 | 0.0000 | 2.52 | 0.0000 | 2.66 | 0.0000 |
| 3868      | KRT16       | 3.26 | 0.0000 | 2.61 | 0.0000 | 2.67 | 0.0000 |
| 6318      | SERPINB4    | 2.68 | 0.0035 | 1.63 | 0.0000 | 2.69 | 0.0000 |
| 64135     | IFIH1       | 4.09 | 0.0000 | 2.13 | 0.0000 | 2.71 | 0.0000 |
| 94240     | EPSTI1      | 2.56 | 0.0000 | 2.10 | 0.0000 | 2.73 | 0.0000 |
| 3434      | IFIT1       | 4.01 | 0.0000 | 2.24 | 0.0000 | 2.80 | 0.0000 |
| 54625     | PARP14      | 4.30 | 0.0000 | 2.41 | 0.0000 | 2.82 | 0.0000 |
| 4940      | OAS3        | 3.04 | 0.0000 | 2.32 | 0.0000 | 2.90 | 0.0000 |
| 51191     | HERC5       | 3.17 | 0.0000 | 1.98 | 0.0000 | 2.91 | 0.0000 |
| 115362    | GBP5        | 3.05 | 0.0000 | 1.80 | 0.0000 | 2.91 | 0.0000 |
| 684       | BST2        | 3.37 | 0.0000 | 2.20 | 0.0000 | 2.92 | 0.0000 |
| 2633      | GBP1        | 3.16 | 0.0000 | 2.43 | 0.0000 | 2.97 | 0.0000 |

|                                                                        |        |       |        |       |        |       |        |
|------------------------------------------------------------------------|--------|-------|--------|-------|--------|-------|--------|
| 6772                                                                   | STAT1  | 3.37  | 0.0000 | 2.60  | 0.0000 | 3.01  | 0.0000 |
| 6701                                                                   | SPRR2B | 2.57  | 0.0003 | 1.92  | 0.0000 | 3.03  | 0.0012 |
| 28708                                                                  | TRAJ47 | 1.35  | 0.0514 | 2.79  | 0.0111 | 3.06  | 0.0008 |
| 6280                                                                   | S100A9 | 4.97  | 0.0000 | 2.95  | 0.0000 | 3.10  | 0.0000 |
| 9636                                                                   | ISG15  | 4.11  | 0.0000 | 2.90  | 0.0000 | 3.10  | 0.0000 |
| 4938                                                                   | OAS1   | 3.22  | 0.0000 | 2.61  | 0.0000 | 3.15  | 0.0000 |
| 353145                                                                 | LCE3E  | 4.45  | 0.0000 | 2.76  | 0.0000 | 3.21  | 0.0000 |
| 3437                                                                   | IFIT3  | 4.18  | 0.0000 | 2.55  | 0.0000 | 3.25  | 0.0000 |
| 4599                                                                   | MX1    | 3.36  | 0.0000 | 2.79  | 0.0000 | 3.36  | 0.0000 |
| 28734                                                                  | TRAJ21 | 1.23  | 0.0503 | 2.52  | 0.0000 | 3.36  | 0.0000 |
| 6373                                                                   | CXCL11 | 1.96  | 0.0023 | 2.77  | 0.0000 | 3.67  | 0.0000 |
| 10561                                                                  | IFI44  | 4.28  | 0.0000 | 3.77  | 0.0000 | 4.36  | 0.0000 |
| 4283                                                                   | CXCL9  | 4.55  | 0.0000 | 3.47  | 0.0000 | 4.47  | 0.0000 |
| 10964                                                                  | IFI44L | 4.34  | 0.0000 | 3.94  | 0.0000 | 4.54  | 0.0000 |
| 286887                                                                 | KRT6C  | 2.10  | 0.0111 | 4.32  | 0.0000 | 4.99  | 0.0000 |
| 3627                                                                   | CXCL10 | 5.37  | 0.0000 | 4.49  | 0.0000 | 5.30  | 0.0000 |
| <b>7 genes not regulated in the same direction in DM, DLE and SCLE</b> |        |       |        |       |        |       |        |
| 92196                                                                  | DAPL1  | 1.41  | 0.0368 | -1.67 | 0.0011 | -2.06 | 0.0000 |
| 6193                                                                   | RPS5   | 1.14  | 0.0036 | -1.30 | 0.0000 | -1.50 | 0.0000 |
| 60674                                                                  | GAS5   | 2.16  | 0.0000 | -1.15 | 0.0176 | -1.15 | 0.0199 |
| 10631                                                                  | POSTN  | 1.76  | 0.0083 | -1.18 | 0.0022 | -1.04 | 0.0077 |
| 539                                                                    | ATP5O  | 1.77  | 0.0000 | -1.30 | 0.0016 | -1.04 | 0.0140 |
| 6155                                                                   | RPL27  | 2.81  | 0.0000 | -1.24 | 0.0109 | -1.03 | 0.0334 |
| 6351                                                                   | CCL4   | -1.01 | 0.0050 | 1.28  | 0.0000 | 1.55  | 0.0000 |

**Supplemental Table 2:** Genomatix Pathway System Transcription factor analysis from the 251 genes regulated in the same direction in DM, DLE and SCLE compared to controls (selected transcription factors have a validated or a predicted binding site and at least one evidence with the respective gene). A. Transcription factors and corresponding number of target genes. B. List of target genes for major transcription factors. The + signs indicate the presence of a transcription factor binding site sequence, upstream from the gene indicated.

A.

| Transcription factors in the 244 gene list | Number of genes (in the 244 gene list) having a potential binding site in their promoter for the indicated transcription factor |
|--------------------------------------------|---------------------------------------------------------------------------------------------------------------------------------|
| STAT1                                      | 45                                                                                                                              |
| IRF1                                       | 33                                                                                                                              |
| STAT2                                      | 20                                                                                                                              |
| NMI                                        | 0                                                                                                                               |
| TFEC                                       | 0                                                                                                                               |
| IFI16                                      | 0                                                                                                                               |
| MNDA                                       | 0                                                                                                                               |
| HMGB3P1                                    | 0                                                                                                                               |
| SRY                                        | 0                                                                                                                               |
| PPARGC1A                                   | 0                                                                                                                               |
| SP100                                      | 0                                                                                                                               |
| SP110                                      | 0                                                                                                                               |

B.

| Gene     | Transcription factor |      |       |
|----------|----------------------|------|-------|
|          | STAT1                | IRF1 | STAT2 |
| C1QB     | +                    |      |       |
| SERPINB3 | +                    |      |       |
| SAMD9L   | +                    |      |       |
| DDX58    | +                    | +    | +     |
| OAS2     |                      |      | +     |
| RSAD2    | +                    | +    |       |
| IFI27    | +                    |      |       |
| CYBB     | +                    | +    | +     |
| LYZ      |                      | +    |       |
| CCL5     | +                    | +    | +     |
| IRF1     | +                    |      | +     |
| TNFSF10  | +                    | +    | +     |
| SAMHD1   | +                    |      | +     |
| TRIM22   |                      | +    |       |
| PTPRC    | +                    |      |       |
| ISG15    | +                    | +    | +     |
| CLEC7A   |                      | +    |       |
| IFI44    | +                    |      | +     |
| USP18    | +                    |      | +     |
| LILRB1   | +                    |      |       |
| IFIT3    | +                    | +    | +     |
| IFIT1    | +                    | +    | +     |
| NMI      | +                    | +    |       |

|          |   |   |   |
|----------|---|---|---|
| IVL      | + |   |   |
| CXCL11   | + | + | + |
| BIRC3    | + | + |   |
| CXCL10   | + | + |   |
| GZMA     | + | + |   |
| EIF2AK2  | + | + | + |
| XAF1     | + | + |   |
| CXCL9    | + | + |   |
| MX1      | + | + | + |
| IFITM1   | + | + | + |
| CTSS     |   | + |   |
| PARP9    | + | + |   |
| CCR1     | + |   |   |
| BST2     |   | + |   |
| AIM2     | + | + |   |
| OAS1     | + | + | + |
| PPARGC1A | + | + |   |
| IFIT2    | + |   | + |
| CD69     | + | + |   |
| DTX3L    | + | + |   |
| SERPINB4 | + |   |   |
| IFIH1    | + |   |   |
| B2M      |   | + | + |
| STAT2    | + | + |   |
| GBP1     | + |   |   |
| MX2      | + |   |   |
| STAT1    | + | + | + |
| PARP14   | + | + |   |
